# Supplementary material for: Atypical Membrane-Anchored Cytokine MIF in a Marine Dinoflagellate
Source: MDPI journal article supplement (doi:10.3390/microorganisms8091263), 2020-08-20
Supplement: s1 [file s1]

**Table S1.** Accessions, names and primer sequences for transcripts analyzed in this study.

| GenBank ID | Name     | Primer Sequence (5' to 3') | Use                         |
|------------|----------|----------------------------|-----------------------------|
| JO713726.1 | LpMIF    | ATGTCCTGTGCTGCGCAAGA       | full length cDNA sequencing |
|            |          | TCATCCAGCGAAGGTGGCG        |                             |
| JO713726.1 | LpMIF    | CAGGACATCATCTGGGGTGG       | RT-qPCR                     |
|            |          | GTAAATCCGGTTCTGGGGCA       |                             |
| AY423582.1 | Lp actin | CGAGCTGTTTCCCTCCAT         | RT-qPCR                     |
|            |          | TTCCATGTCGTCCAGTTCG        |                             |
| AF028562.1 | Lp GAPDH | ATGGGGATCAATGGCTTCGG       | RT-qPCR                     |
|            |          | GCCATCAACTTCCTTCGTGC       |                             |

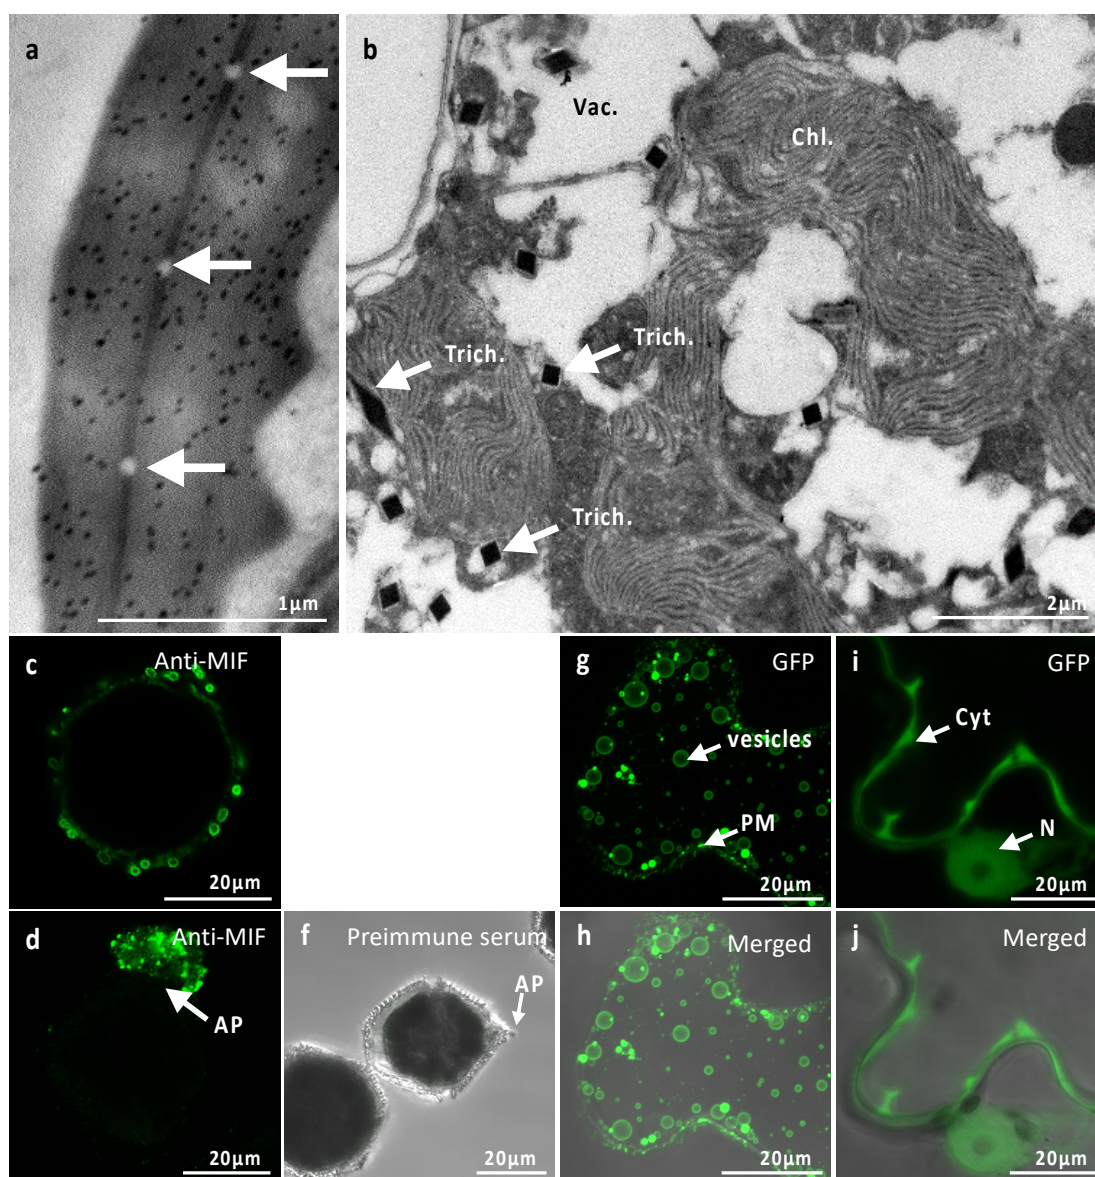

**Figure S1.** (a,b) Immunogold-labelled electron micrographs of *L. polyedra*. (a) Representative section of the apical pore showing an important accumulation of gold particles (black dots). The secretory pores are indicated by white arrows. (b) Representative image of *L. polyedra* cell content showing a vacuole (vac.), chloroplast (chl.) and the

typical sections of the trichocysts (Trich.). Note that no labelled LpMIF (black dots) are observed. **(c,d)** Images corresponding to Figure 2g and h but only with LpMIF labelled in green (Alexa 488®). **(e,f)** Negative control samples directly exposed to the secondary antibody (but no primary antibody) or exposed to pre-immune serum prior to secondary antibody. No labelling was detected in either case. The white arrow indicates the apical pore. **(g-j)** Subcellular localization of LpMIF fused at the N-terminus to GFP, and expressed with **(g,h)** or without the transmembrane domain **(i,j)** in *Nicotiana benthamiana*. **(g,h)** GFP:LpMIF with its endogenous transmembrane domain localizes to vesicle membranes and accumulates in the plasma membrane (PM). **(i,j)** The MIF domain of LpMIF (GFP:LpMIF\_TM) without the transmembrane domain localizes to the cytoplasm (Cyt) and the nucleus (N).

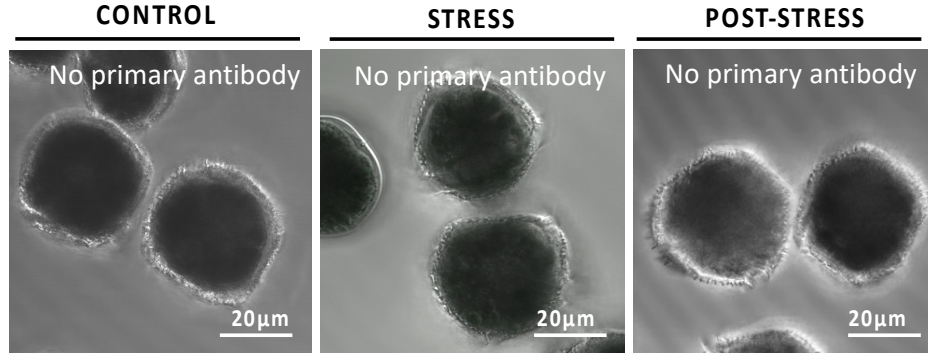

**Figure S2.** Negative control samples of unstressed (Control) and stressed *L. polyedra* (in the presence of copepods), and after recovery (Post-Stress). Samples were directly exposed to the secondary antibody without the primary antibody.
